# Supplementary material for: Hyaluronic Acid Injections Are Associated with Delay of Total Knee Replacement Surgery in Patients with Knee Osteoarthritis: Evidence from a Large U.S. Health Claims Database
Source: PLoS One. 2015 Dec 22;10(12):e0145776. doi: 10.1371/journal.pone.0145776 (PMC4687851; doi:10.1371/journal.pone.0145776)
Supplement: S1 Text — (XLSX) [file pone.0145776.s001.xlsx]

## Sheet: New Figure 4
Kaplan-Meier Analysis of Time to TKR (All TKR patients with HA treatments)
							Median Time to TKR
	Log-rank Test						Therapy between OA to TKR	Median Time to TKR (days)	%95 CI Lower	%95 CI Upper
	Therapy between OA to TKR	Chi-square	P-value				HA patients	484	479	489
	HA patients vs. non HA patients	19769.1	<.0001				non HA patients	114	113	116
							Time (yr)	Survival rate (proportion with no TKR)
								Non-HA patients	HA patients
							0.5	39.61	85.54
							1	24.93	62.89
							1.5	16.53	45.2
							2	11.24	32.11
							2.5	7.51	22.5
							3	4.97	15.28
							3.5	3.08	9.83
							4	1.81	5.97
							4.5	0.911	3.12
							5	0.371	1.29
							5.5	0.093	0.27
							6	0.002	0.014

## Sheet: New Figure 5
Kaplan-Meier Analysis of Time to TKR (All TKR patients with HA treatments)
							Median Time to TKR
	Log-rank Test						Therapy between OA to TKR	Median Time to TKR (days)	%95 CI Lower	%95 CI Upper
	Therapy between OA to TKR	Chi-square	P-value				HA 1 course	386	383	391
	HA 1 course vs. non HA patients	13724.6	<.0001				HA 2 courses	648	639	658
	HA 2 courses vs. non HA patients	18138.7	<.0001				HA 3 courses	875	856	899
	HA 3 courses vs. non HA patients	19363.5	<.0001				HA 4 courses	1054	1030	1082
	HA 4 courses vs. non HA patients	19664.4	<.0001				HA 5 courses	1312	1278	1347
	HA 5 courses vs. non HA patients	19934.6	<.0001				Non HA patients	114	113	116
							Time (yr)	Survival rate (proportion without TKR)
								0 course	1 course	2 courses	3 courses	4 courses	5+ courses
							0.5	39.61	80.96	97.11	99.86	99.99	99.9999
							1	24.93	53.42	84.02	96.84	99.24	99.9999
							1.5	16.53	35.5	61.97	86.7	95.25	98.03
							2	11.24	24.1	42.92	67.12	83.37	94.61
							2.5	7.51	16.37	29.19	47.86	67.78	85.92
							3	4.97	10.72	19.99	32.63	47.24	73.16
							3.5	3.08	6.78	12.56	20.91	31.46	55.39
							4	1.81	4.01	7.69	13.01	18.54	37.5
							4.5	0.911	2.11	4.07	6.93	7.79	20.92
							5	0.371	0.836	1.91	2.69	2.76	8.82
							5.5	0.0934	0.16	0.472	0.647	0.475	1.58
							6	0.0023	0.0027	0.045	0	0.0951	0.132

## Sheet: Tab3_TKR
	Table 1. Demographic and Clinical Characteristics (TKR patients)
	Demographic descriptors	HA Patients		Non-HA Group		P-Value
		N=50,349		N=131,673
	Age (n,%):
	18-44 years	1713	3.40225	2966	2.25255	<.0001
	45-54	12193	24.217	23563	17.8951
	55-64	24034	47.7348	63540	48.2559
	65+	12409	24.646	41604	31.5965
	Mean	59.651		61.5282		<.0001
	SD	8.86089		8.87992
	Gender (n,%):
	Male	19386	38.5032	57628	43.766	<.0001
	Payer Type (n,%):
	Commercial Plan	29770	59.1273	79036	60.0245	<.0001
	Medicaid	241	0.478659	884	0.67136
	Medicare Risk	1759	3.49361	6348	4.82103
	Medicare Cost	934	1.85505	2973	2.25787
	Self-Insured	17328	34.4158	41708	31.6754
	Unknown	317	0.629605	724	0.549847
	Geographic Region (n,%):
	Northeast	13032	25.8833	29833	22.6569	<.0001
	Midwest	18399	36.5429	48035	36.4805
	South	13767	27.3431	36798	27.9465
	West	5151	10.2306	17007	12.9161
	Physician Specialty (n,%):
	Orthopedic Surgery	22051	43.7963	59547	45.2234	<.0001
	GP/FP/IM	5212	10.3517	13436	10.2041
	Orthopedics	3486	6.92367	9376	7.12067
	Rehabilitation Medicine	950	1.88683	1416	1.07539
	Rheumatology	722	1.43399	838	0.636425
	Other	17928	35.6075	47060	35.7401
	Charlson Comorbidity Score (n,%):
	0	32992	65.5266	84797	64.3997	<.0001
	1	9036	17.9467	23943	18.1837
	2	5134	10.1968	13789	10.4722
	3	1837	3.64853	5189	3.94082
	4+	1350	2.68128	3955	3.00365
	Mean	0.624302		0.656748		<.0001
	SD	1.10101		1.13724
	Median	0		0
	1st quartile	0		0
	3rd quartile	1		1
	Comorbidities of Interest (n,%):
	Hypertension	22991	45.6633	61494	46.7021	<.0001
	Hyperlipidemia	21236	42.1776	53197	40.4008	<.0001
	Diabetes	8251	16.3876	23443	17.804	<.0001
	Schizophrenia	54	0.107251	105	0.079743	0.0756
	Major depression	1534	3.04673	3171	2.40824	<.0001
	Bipolar disorder	473	0.939443	984	0.747306	<.0001
	Vascular disease	12479	24.785	33568	25.4935	0.0019
	Liver disease	1238	2.45884	2764	2.09914	<.0001
	Renal disease	2563	5.09047	7092	5.38607	0.0118
	Substance abuse disorder	1569	3.11625	3921	2.97783	0.1225
	COPD	1687	3.35061	4707	3.57476	0.0201
	Anemia	3254	6.46289	8572	6.51007	0.7149
	Medications of Interest (n,%):
	Corticosteroids	14296	28.3938	27407	20.8144	<.0001
	NSAIDS	14112	28.0284	29953	22.748	<.0001
	Cox-2 Inhibitors	3149	6.25434	6977	5.29873	<.0001
	Analgesics Non-Narcotic	619	1.22942	1229	0.933373	<.0001
	Opioids	17763	35.2797	40980	31.1226	<.0001
	Anti-Inflammatory Analgesics (non-NSAID)	149	0.295934	290	0.220243	0.0032
	H2 blocker	1056	2.09736	2521	1.91459	0.012
	PPI	9271	18.4135	20876	15.8544	<.0001
	Pre-index resource utilization	49.207		43.1482		<.0001
	Pre-index healthcare costs	7624.85		6792.21		<.0001
	Note: The demographic and dlinical characteristics were provided on or before first OA date. The grouping of TKR patients: HA and non HA, was based on the drug usage between first OA date and TKR date.

## Sheet: Table 1a
Table 1a. Demographic and Clinical Characteristics (all HA)
	All HA Courses		HA 1 Course		HA 2 Courses		HA 3 Courses		HA 4 Courses		HA 5+ Courses		P-value
													HA 1 vs. HA 2	HA 1 vs. HA 3	HA 1 vs. HA 4	HA 1 vs. HA 5+
Total Patients	50389		36260		8709		3179		1354		887
Age (Years) (n,%):
18-44	4597	9.12302	3414	9.41533	738	8.47399	256	8.05285	123	9.08419	66	7.44081	0.0005	0.0573	0.9654	0.0004
45-54	14733	29.2385	10571	29.1533	2579	29.613	968	30.4498	391	28.8774	224	25.2537
55-64	20467	40.618	14608	40.2868	3659	42.014	1282	40.3271	552	40.7681	366	41.2627
65+	10592	21.0205	7667	21.1445	1733	19.899	673	21.1702	288	21.2703	231	26.0428
Mean	57.5232		57.4843		57.437		57.7282		57.8479		58.7328		0.7071	0.2123	0.2156	0.0005
SD	10.511		10.6112		10.2442		10.1307		10.5006		10.2612
Median	57		57		57		57		57		58		0.5924	0.5512	0.6938	0.0009
1st quartile	51		51		51		51		51		52
3rd quartile	63		63		62		62		62		65
Gender (n,%):
Male	20421	40.5267	14836	40.9156	3420	39.2697	1278	40.2013	531	39.2171	356	40.1353	0.005	0.4321	0.2119	0.6405
Female	29968	59.4733	21424	59.0844	5289	60.7303	1901	59.7987	823	60.7829	531	59.8647
Plan Type (n,%):
Consumer-directed Healthcare Product	123	0.244101	98	0.27027	16	0.183718	5	0.157282	1	0.0738552	3	0.338219	0.0074	0.2504	0.0184	0.4642
Health Maintenance Organization (HMO)	7171	14.2313	5075	13.9961	1291	14.8237	473	14.8789	207	15.288	125	14.0924
Indemnity Plan	3628	7.19998	2594	7.15389	635	7.29131	201	6.32274	124	9.15805	74	8.34273
Point of Service (POS)	2463	4.88797	1739	4.79592	449	5.15559	162	5.09594	61	4.50517	52	5.86246
Preferred Provider Organization (PPO)	36479	72.3948	26396	72.7965	6206	71.2596	2309	72.6329	944	69.7194	624	70.3495
Unknown	525	1.04189	358	0.987314	112	1.28603	29	0.912237	17	1.25554	9	1.01466
Payer Type (n,%):
Commercial Plan	28766	57.0879	20612	56.845	5013	57.5611	1830	57.5653	788	58.1979	523	58.9628	0.4134	0.2092	0.0126	0.0163
Medicaid	147	0.29173	105	0.289575	19	0.218165	15	0.471846	3	0.221566	5	0.563698
Medicare Risk	1010	2.00441	734	2.02427	169	1.94052	69	2.17049	27	1.99409	11	1.24014
Medicare Cost	969	1.92304	671	1.85052	164	1.88311	68	2.13904	39	2.88035	27	3.04397
Self-Insured	19212	38.1274	13941	38.4473	3286	37.7311	1184	37.2444	484	35.7459	317	35.7384
Unknown	285	0.5656	197	0.543298	58	0.665978	13	0.408934	13	0.960118	4	0.450958
Geographic Region (n,%):
Northeast	13449	26.6903	9395	25.9101	2488	28.5681	929	29.223	387	28.582	250	28.1849	<.0001	<.0001	0.0002	0.0031
Midwest	17945	35.6129	12817	35.3475	3097	35.5609	1169	36.7726	522	38.5524	340	38.3315
South	15023	29.814	11190	30.8605	2427	27.8677	826	25.983	358	26.4402	222	25.0282
West	3972	7.88267	2858	7.88196	697	8.00322	255	8.02139	87	6.42541	75	8.45547
Physician Specialty (n,%):
Orthopedic Surgery	24131	47.8894	17539	48.3701	4098	47.0548	1469	46.2095	637	47.0458	388	43.743	0.0084	0.0011	0.0187	0.0101
GP/FP/IM	968	1.92105	662	1.8257	182	2.08979	69	2.17049	34	2.51108	21	2.36753
Orthopedics	2983	5.91994	2068	5.70325	515	5.91342	228	7.17207	100	7.38552	72	8.11725
Physical Medicine and Rehabilitation	1520	3.01653	1043	2.87645	303	3.47916	100	3.14564	45	3.32349	29	3.26945
Rheumatology	3852	7.64453	2818	7.77165	652	7.48651	218	6.8575	89	6.57312	75	8.45547
Other	16935	33.6085	12130	33.4528	2959	33.9763	1095	34.4448	449	33.161	302	34.0474
Charlson Comorbidity Score (n,%):
0	30761	61.0471	22196	61.2135	5271	60.5236	1939	60.994	815	60.192	540	60.8794	0.1593	0.4571	0.6106	0.092
1	9977	19.8	7138	19.6856	1778	20.4157	601	18.9053	274	20.2363	186	20.9696
2	5703	11.3179	4080	11.2521	1023	11.7465	372	11.7018	150	11.0783	78	8.79369
3	2187	4.34023	1572	4.33536	355	4.07624	156	4.9072	57	4.20975	47	5.29876
4+	1761	3.49481	1274	3.51351	282	3.23803	111	3.49166	58	4.2836	36	4.05862
Mean	0.728373		0.726586		0.724423		0.742057		0.758493		0.745209		0.8796	0.486	0.3373	0.6485
SD	1.19952		1.20026		1.18134		1.20369		1.23152		1.28123
Median	0		0		0		0		0		0
1st quartile	0		0		0		0		0		0
3rd quartile	1		1		1		1		1		1
Comorbidities of Interest (n,%):
Hypertension	25181	49.9732	18052	49.7849	4428	50.844	1587	49.9214	685	50.5908	429	48.3653	0.0759	0.8827	0.5603	0.4035
Hyperlipidemia	24168	47.9628	17253	47.5814	4235	48.6279	1519	47.7823	687	50.7386	474	53.4386	0.0791	0.8278	0.0224	0.0006
Diabetes	9062	17.9841	6544	18.0474	1572	18.0503	543	17.0808	241	17.7991	162	18.2638	0.995	0.1735	0.8155	0.8685
Schizophrenia	54	0.107166	38	0.104799	8	0.091859	6	0.188739	1	0.0738552	1	0.11274	0.7345
Major depression	1640	3.25468	1177	3.246	288	3.30692	109	3.42875	41	3.02806	25	2.81849	0.7737	0.578	0.6565	0.4771
Bipolar disorder	525	1.04189	363	1.0011	96	1.10231	38	1.19534	15	1.10783	13	1.46561	0.3988	0.2952	0.6991	0.1721
Vascular disease	15082	29.9311	10849	29.92	2605	29.9116	949	29.8522	413	30.5022	266	29.9887	0.9877	0.9361	0.6461	0.9648
Liver disease	1512	3.00065	1071	2.95367	280	3.21506	95	2.98836	38	2.8065	28	3.15671	0.1994	0.9118	0.7533	0.7244
Renal disease	3034	6.02116	2176	6.0011	497	5.70674	213	6.70022	87	6.42541	61	6.87711	0.2968	0.1131	0.5191	0.2786
Substance abuse disorder	2018	4.00484	1498	4.13127	331	3.80067	115	3.61749	47	3.4712	27	3.04397	0.1607	0.1608	0.2295	0.1069
COPD	2016	4.00087	1470	4.05405	333	3.82363	116	3.64895	58	4.2836	39	4.39684	0.325	0.2649	0.6744	0.6094
Anemia	4261	8.45621	3033	8.36459	729	8.37065	290	9.12237	128	9.45347	81	9.13191	0.9854	0.1403	0.1562	0.4152
Medications of Interest (n,%):
Corticosteroids	30861	61.2455	22400	61.7761	5216	59.8921	1897	59.6729	816	60.2659	532	59.9775	0.0012	0.0194	0.2617	0.2762
NSAIDS	19391	38.4826	14091	38.861	3248	37.2948	1221	38.4083	525	38.774	306	34.4983	0.007	0.6155	0.9486	0.0084
Cox-2 Inhibitors	4381	8.69436	3071	8.46939	802	9.20886	298	9.37402	123	9.08419	87	9.80834	0.0272	0.0802	0.4256	0.1578
Analgesics Non-Narcotic	859	1.70474	599	1.65196	160	1.83718	47	1.47845	29	2.1418	24	2.70575	0.2282	0.4599	0.1672	0.0157
Opioids	24801	49.2191	18083	49.8704	4183	48.0308	1494	46.9959	636	46.9719	405	45.6595	0.002	0.0019	0.0362	0.0132
Anti-Inflammatory Analgesics (non-NSAID)	139	0.275854	111	0.306122	13	0.149271	10	0.314564	3	0.221566	2	0.225479	0.0122	0.9342
H2 blocker	1342	2.66328	957	2.63927	242	2.77873	84	2.64234	27	1.99409	32	3.60767	0.4682	0.9917	0.1442	0.0767
PPI	10564	20.9649	7446	20.535	1876	21.5409	708	22.2712	325	24.003	209	23.5626	0.0376	0.0205	0.002	0.0276
Pre-index resource utilization	69.8564		69.076		70.8629		72.5005		75.2674		74.1387		0.0044	0.0004	<.0001	0.0044
Pre-index healthcare costs	10961.5		10947.3		10934.2		10748.9		12400.2		10375.3		0.9517	0.5492	0.0041	0.3506
Note: P-values are available for percentages (chi-quare test), means (t-test/ANOVA), and medians (Wilcoxon/Kruskal-Wallis test).
Bad chi-sq pvalues were suppressed.

## Sheet: Table 2
Table 2. HA Analysis
	All HA Courses		HA 1 Course		HA 2 Courses		HA 3 Courses		HA 4 Courses		HA 5+ Courses		P-value
	50389		36260		8709		3179		1354		887
	N	%	N	%	N	%	N	%	N	%	N	%	HA 1 vs. HA 2	HA 1 vs. HA 3	HA 1 vs. HA 4	HA 1 vs. HA 5+
Injection Courses
1	36260	71.9602	36260	100	0	0	0	0	0	0	0	0	<.0001	<.0001	<.0001	<.0001
2	8709	17.2835	0	0	8709	100	0	0	0	0	0	0
3	3179	6.30892	0	0	0	0	3179	100	0	0	0	0
4	1354	2.68709	0	0	0	0	0	0	1354	100	0	0
5+	887	1.7603	0	0	0	0	0	0	0	0	887	100
Injections in Index Course
1	10936	21.7031	7688	21.2024	1978	22.7121	733	23.0576	299	22.0827	238	26.832	0.0021	0.0144	0.4368	<.0001
2	3292	6.53317	2470	6.81191	526	6.03973	182	5.72507	71	5.24372	43	4.8478
3	24906	49.4275	17847	49.2195	4291	49.2709	1596	50.2045	713	52.6588	459	51.7475
4	1819	3.60991	1363	3.75896	290	3.32989	98	3.08273	49	3.61891	19	2.14205
5+	9436	18.7263	6892	19.0072	1624	18.6474	570	17.9302	222	16.3959	128	14.4307
Days between injections within index course
Mean	7.26737		7.22963		7.32589		7.43921		7.27473		7.6621		0.059	0.0079	0.6952	0.0033
SD	3.88425		3.64744		4.21409		4.71933		4.25244		5.80782
Median	6		6		6		6		6		6
1st quartile	6		6		6		6		6		6
3rd quartile	7		7		7		7		7		7
Days between courses
Mean	350.698				454.986		348.757		270.26		204.157
SD	212.386				262.061		166.07		105.209		62.7478
Median	279				383		315		246		193
1st quartile	197				233		217		195		181
3rd quartile	435				655		440		330		227
Patients experiencing TKR (n,%) **	12958	25.7159	10286	28.3673	1977	22.7007	514	16.1686	137	10.1182	44	4.96054	<.0001	<.0001	<.0001	<.0001
Days between IA initiation and TKR
Mean	435.537		375.587		617.642		776.957		855.599		971.523		<.0001	<.0001	<.0001	<.0001
SD	288.782		270.556		233.02		183.741		159.684		89.2046
Median	363.5		291		602		776		872		969.5		<.0001	<.0001	<.0001	<.0001
1st quartile	187		159		425		634		722		909
3rd quartile	657		545		804		937		990		1056
Days between last IA injection before TKR and TKR
Mean	335.655		359.428		264.441		199.63		158.19		119.659		<.0001	<.0001	<.0001	<.0001
SD	258.195		270.512		188.207		125.516		93.4783		61.8193
Median	253		273.5		215		180		146		110		<.0001	<.0001	<.0001	<.0001
1st quartile	134		142		120		104		85		61
3rd quartile	474		530		364		272		210		164.5
Procedures of interest (n,%)
Osteotomy	51	0.101213	41	0.113072	8	0.091859	1	0.0314564	0	0	1	0.11274	0.59
Radiologic exam of the knee	32092	63.6885	21526	59.3657	6552	75.2325	2396	75.3696	999	73.7814	619	69.7858	<.0001	<.0001	<.0001	<.0001
Arthrocentesis of knee	48256	95.7669	34193	94.2995	8667	99.5177	3167	99.6225	1348	99.5569	881	99.3236	<.0001	<.0001	<.0001	<.0001
Arthroscopy of knee	136	0.2699	110	0.303365	22	0.252612	4	0.125826	0	0	0	0	0.4318	0.0738
Meniscectomy	4269	8.47209	2857	7.87921	922	10.5867	320	10.0661	122	9.01034	48	5.4115	<.0001	<.0001	0.1302	0.0068
Meniscus repair	54	0.107166	36	0.099283	11	0.126306	3	0.0943693	3	0.221566	1	0.11274	0.4834
Partial knee replacement	1466	2.90937	1191	3.28461	206	2.36537	43	1.35263	19	1.40325	7	0.789177	<.0001	<.0001	0.0001	<.0001
Arthroscopic microfracture	683	1.35545	454	1.25207	146	1.67643	54	1.69865	23	1.69867	6	0.676437	0.0019	0.0323	0.1493	0.1256
Arthrotomy of knee with synovial biopsy	7	0.0138919	6	0.0165472	1	0.0114824	0	0	0	0	0	0
Diagnostic ultrasound	6650	13.1973	4537	12.5124	1328	15.2486	454	14.2812	198	14.6233	133	14.9944	<.0001	0.004	0.0215	0.0276
Image-guided injections	1502	2.98081	780	2.15113	386	4.4322	184	5.78798	86	6.35155	66	7.44081	<.0001	<.0001	<.0001	<.0001
Charge amount of index injections	438.071		434.951		443.657		451.252		432.183		472.629		0.1776	0.0932	0.8472	0.0407
Allowed amount of index injections	329.41		322.162		342.947		350.81		350.745		383.543		<.0001	<.0001	0.0007	<.0001
Paid amount of index injections	268.863		261.335		283.735		292.076		293.158		310.278		<.0001	<.0001	0.0001	<.0001
** TKR has to be within the 3 year post index period.

## Sheet: Table 3a
Table 3a. OA to TKR Subgroup of Patients (All HA) (n=50,389)
Time interval of interest (days) from:	Mean	Median	STD	N=		1st quartile	3rd quartile
OA diagnosis to first NSAID claim	422.42	196	511.072	32081		27	684
OA diagnosis to first HA claim	228.628	92	289.815	50389		13	371
Time to TKR (HA 1 course patients only)	762.76	658	505.877	11625		351	1078
Time to TKR HA 2 course patients only)	1038.59	968	481.026	2487		660	1342
Time to TKR (HA 3 course patients only)	1248.62	1174	462.439	773		878	1596
Time to TKR (HA 4 course patients only)	1366.56	1325	401.025	278		1061	1617
Time to TKR (HA ≥5 course patients only)	1555.8	1525	387.885	125		1236	1784
Time to TKR (all HA patients)	849.661	764	525.059	15288		419	1189

## Sheet: Table 4
	Table 4. Adverse Event Analysis
		All HA Courses		HA 1 Course		HA 2 Courses		HA 3 Courses		HA 4 Courses		HA ≥5 Courses				P-value
	Adverse	50389		36260		8709		3179		1354		887
	Event	N=	%	N=	%	N=	%	N=	%	N=	%	N=	%			HA 1 vs. HA 2	HA 1 vs. HA 3	HA 1 vs. HA 4	HA 1 vs. HA 5+
	Arthralgia	13492	26.7757	8362	23.0612	2928	33.6204	1218	38.3139	582	42.9838	402	45.3213			<.0001	<.0001	<.0001	<.0001
	Pain in knee	11966	23.7472	7519	20.7363	2599	29.8427	1017	31.9912	497	36.7061	334	37.655			<.0001	<.0001	<.0001	<.0001
	Joint effusion	1316	2.61168	762	2.10149	281	3.22655	152	4.78138	64	4.72674	57	6.42616			<.0001	<.0001	<.0001	<.0001
	Joint swelling	1252	2.48467	731	2.016	264	3.03135	145	4.56118	61	4.50517	51	5.74972			<.0001	<.0001	<.0001	<.0001
	Joint stiffness	366	0.726349	181	0.499173	100	1.14824	40	1.25826	21	1.55096	24	2.70575			<.0001	<.0001	<.0001
	Bursitis	427	0.847407	242	0.667402	109	1.25158	39	1.2268	17	1.25554	20	2.25479			<.0001	0.0003	0.0102	<.0001
	Gait disturbance	255	0.506063	129	0.355764	65	0.746354	23	0.723498	18	1.32939	20	2.25479			<.0001	0.0013	<.0001
	Injection site edema	35	0.0694596	12	0.0330943	11	0.126306	5	0.157282	4	0.295421	3	0.338219
	Itching	78	0.154796	40	0.110314	21	0.24113	7	0.220195	6	0.443131	4	0.450958			0.0029
	Rash	169	0.335391	88	0.242692	42	0.48226	16	0.503303	10	0.738552	13	1.46561			0.0002	0.006
	Synovitis	688	1.36538	352	0.970767	164	1.88311	99	3.11419	35	2.58493	38	4.2841			<.0001	<.0001	<.0001	<.0001
	Joint disorder	16126	32.003	10133	27.9454	3448	39.5912	1419	44.6367	671	49.5569	455	51.2965			<.0001	<.0001	<.0001	<.0001
	Localized osteoarthritis	26629	52.8469	18449	50.8798	4897	56.2292	1915	60.2391	837	61.8168	531	59.8647			<.0001	<.0001	<.0001	<.0001
	Note: The diagnosis ICD_9 codes for these Adverse Events may not be mutually exclusive

## Sheet: Table 7c
Table 7c. Kaplan-Meier Analysis of Time to TKR (Main cohorts: All HA users, N=50,389)
	Log-rank Test
	Index Therapy	Chi-square	P-value
	HA 2 courses vs. HA 1 course	366.6	<.0001
	HA 3 courses vs. HA 1 course	591.9	<.0001
	HA 4 courses vs. HA 1 course	657.6	<.0001
	HA 5+ courses vs. HA 1 course	681.3	<.0001
							Survival rate (proportion without TKR)
						Time (yr)	1 course	2 courses	3 courses	4 courses	5+ courses
						0.5	0.915	0.998	1	1	1
						1	0.8312	0.9658	0.9997	0.9993	1
						1.5	0.788	0.9046	0.9833	0.9978	1
						2	0.7587	0.8514	0.9321	0.9749	0.9989
						2.5	0.7349	0.8068	0.8871	0.9431	0.9899
						3	0.7163	0.773	0.8383	0.8988	0.9504

## Sheet: Table 7d
	Table 7d. Cox Proportional Hazards Model of the Risk of Having TKR (Main cohorts: All HA users, N=50,389)
		Hazard	Chi	P
	Independent Variables	Ratio	Squared	value
	Number of HA courses
	HA 2 courses vs. HA 1 course	0.71	193.765	<.0001
	HA 3 courses vs. HA 1 course	0.476	269.932	<.0001
	HA 4 courses vs. HA 1 course	0.288	209.415	<.0001
	HA 5+ courses vs. HA 1 course	0.138	172.582	<.0001
	Age	1.028	846.134	<.0001
	Gender (Male v. female)	0.942	10.4818	0.0012
	Geographic region
	Midwest vs. Northeast	1.19	56.9813	<.0001
	South vs. Northeast	0.935	6.9356	0.0084
	West vs. Northeast	1.003	0.0077	0.9299
	Physician specialty
	GP/FP/IM vs. Orthopedic Surgery	0.771	50.4275	<.0001
	Physical Med vs. Orthopedic Surgery	0.651	49.5209	<.0001
	Rheumatology vs. Orthopedic Surgery	0.729	20.7529	<.0001
	Other vs. Orthopedic Surgery	0.988	0.3393	0.5602
		Hazard	Chi	P
	Independent Variables	Ratio	Squared	value
	Cotricosteroid use
	Corticosteroids pre-index (yes/no)	1.349	242.983	<.0001
	Comorbidities
	Hypertension (yes/no)	1.163	57.0224	<.0001
	Hyperlipidemia (yes/no)	1.093	21.1659	<.0001
	Diabetes (yes/no)	0.922	7.8724	0.005
	Major depression (yes/no)	1.19	13.6982	0.0002
	Vascular disease (yes/no)	0.89	29.2405	<.0001
	Renal disease (yes/no)	0.92	4.6013	0.0319
	COPD (yes/no)	0.91	4.1431	0.0418
	Charlson Comorbidity Index
	CCI Score: 1 vs. 0	1.024	0.7724	0.3795
	CCI Score: 2 vs. 0	0.955	2.0917	0.1481
	CCI Score: 3 vs. 0	0.875	7.3064	0.0069
	CCI Score: 4+ vs. 0	0.781	17.803	<.0001
